# Supplementary material
Source: PubMed Central journal article supplement (PMC2832311)
Supplement: NIHMS103371-supplement-1_si_001.pdf [file NIHMS103371-supplement-1_si_001.pdf]

# Selective 5-Hydroxytryptamine 2C Receptor Agonists Derived from the Lead Compound Tranylcypromine: Identification of Drugs with Antidepressant-Like Action

*Sung Jin Cho,<sup>†,§</sup> Niels H. Jensen,<sup>‡,§</sup> Toru Kurome,<sup>†</sup> Sudhakar Kadari,<sup>†</sup> Michael L. Manzano,<sup>||</sup> Jessica E. Malberg,<sup>||</sup> Barbara Caldarone,<sup>||</sup> Bryan L. Roth,<sup>\*,‡</sup> and Alan P. Kozikowski<sup>\*,†</sup>*

Drug Discovery Program, Department of Medicinal Chemistry and Pharmacognosy, College of Pharmacy (M/C781), University of Illinois at Chicago, 833 South Wood Street, Chicago, Illinois 60612-7230, Department of Pharmacology, Psychiatry, Comprehensive Cancer Center, Center for Neurobiology Division of Medicinal Chemistry and Natural Products, and NIMH Psychoactive Drug Screening Program, University of North Carolina Medical School, Chapel Hill, CB 7365, North Carolina 27599, Psychogenics, Inc., Tarrytown, New York 10591

## Table of contents

|                                                                               |    |
|-------------------------------------------------------------------------------|----|
| Functional activity of compounds 66–74, 78, 80–84, and 86–90 .....            | S2 |
| Copy of <sup>1</sup> H, <sup>13</sup> C and HPLC Spectra of compound 29 ..... | S4 |
| Copy of <sup>1</sup> H, <sup>13</sup> C and HPLC Spectra of compound 37 ..... | S7 |

Table S1. Functional Activity of Compounds **66–74**, **78**, **80–84**, and **86–90** in Calcium Flux Assays Using HEK-293 CellsStably Expressing the Human 5-HT<sub>2A</sub>, 5-HT<sub>2B</sub>, or 5-HT<sub>2C</sub> Receptor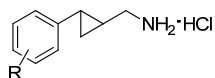

| compd <sup>a</sup> | R | 5-HT <sub>2A</sub>         |                                    |                | 5-HT <sub>2B</sub>         |                                    |                | 5-HT <sub>2C</sub>         |                                    |                | Selectivity |       |  |
|--------------------|---|----------------------------|------------------------------------|----------------|----------------------------|------------------------------------|----------------|----------------------------|------------------------------------|----------------|-------------|-------|--|
|                    |   | EC <sub>50</sub> ±SEM (nM) | E <sub>max</sub> ±SEM <sup>b</sup> | n <sup>c</sup> | EC <sub>50</sub> ±SEM (nM) | E <sub>max</sub> ±SEM <sup>b</sup> | n <sup>c</sup> | EC <sub>50</sub> ±SEM (nM) | E <sub>max</sub> ±SEM <sup>b</sup> | n <sup>c</sup> | 2A/2C       | 2B/2C |  |
| 5-HT (1)           |   | 17                         | ±7.1 100%                          | 14             | 3.0 ±1.5                   | 100%                               | 12             | 0.12 ±0.08                 | 100%                               | 17             | 134         | 24    |  |
| <b>66</b>          |   | NA                         |                                    | 2              | > 1000                     | 43% ±19%                           | 4              | 301 ±278                   | 74% ±3%                            | 4              | > 3         |       |  |
| <b>67</b>          |   | NA                         |                                    | 2              | > 1000                     | 10% ±1%                            | 2              | 1965 ±153                  | 66% ±0.3%                          | 2              | > 1         |       |  |
| <b>68</b>          |   | NA                         |                                    | 2              | NA                         |                                    | 2              | 695 ±444                   | 79% ±6%                            | 3              |             |       |  |
| <b>69</b>          |   | NA                         |                                    | 3              | NA                         |                                    | 3              | 1577 ±1716                 | 87% ±11%                           | 5              |             |       |  |
| <b>70</b>          |   | NA                         |                                    | 2              | NA                         |                                    | 2              | > 1000                     | 61% ±6%                            | 3              |             |       |  |
| <b>71</b>          |   | NA                         |                                    | 2              | NA                         |                                    | 2              | > 1000                     | 41% ±2%                            | 2              |             |       |  |
| <b>72</b>          |   | NA                         |                                    | 2              | NA                         |                                    | 2              | > 1000                     | 39% ±10%                           | 2              |             |       |  |
| <b>73</b>          |   | NA                         |                                    | 2              | > 1000                     | 10% ±27%                           | 2              | > 1000                     | 45% ±3%                            | 2              |             |       |  |
| <b>74</b>          |   | NA                         |                                    | 2              | NA                         |                                    | 2              | 1196 ±639                  | 75% ±12%                           | 2              |             |       |  |
| <b>78</b>          |   | NA                         |                                    | 2              | NA                         |                                    | 2              | 1179 ±531                  | 77% ±4%                            | 2              |             |       |  |
| <b>80</b>          |   | NA                         |                                    | 2              | NA                         |                                    | 2              | > 1000                     | 30% ±13%                           | 2              |             |       |  |
| <b>81</b>          |   | NA                         |                                    | 2              | NA                         |                                    | 2              | > 1000                     | 39% ±6%                            | 2              |             |       |  |
| <b>82</b>          |   | NA                         |                                    | 2              | NA                         |                                    | 2              | > 1000                     | 38% ±8%                            | 2              |             |       |  |
| <b>83</b>          |   | NA                         |                                    | 2              | NA                         |                                    | 2              | > 1000                     | 39% ±26%                           | 3              |             |       |  |
| <b>84</b>          |   | NA                         |                                    | 2              | NA                         |                                    | 2              | > 1000                     | 26% ±10%                           | 2              |             |       |  |
| 5-HT (1)           |   | 10                         | ±1.7 100%                          | 15             | 1.0 ±0.10                  | 100%                               | 15             | 0.09 ±0.01                 | 100%                               | 11             | 111         | 11    |  |
| <b>86</b>          |   | NA                         |                                    | 2              | 204 ±39                    | 84% ±4%                            | 3              | 232 ±99                    | 88% ±6%                            | 2              | > 43        | 0.88  |  |
| <b>87</b>          |   | > 10 μM                    | 42% ±5%                            | 2              | 185 ±34                    | 84% ±2%                            | 3              | 136 ±77                    | 91% ±3%                            | 3              |             | 1.4   |  |
| <b>88</b>          |   | NA                         |                                    | 2              | 1739 ±302                  | 17% ±2%                            | 3              | 332 ±103                   | 79% ±10%                           | 3              | > 30        | 5.2   |  |
| <b>89</b>          |   | NA                         |                                    | 3              | NA                         |                                    | 3              | > 5 μM                     | 62% ±4%                            | 2              |             |       |  |
| <b>90</b>          |   | NA                         |                                    | 2              | NA                         |                                    | 2              | > 10 μM                    | 24% ±3%                            | 2              |             |       |  |

<sup>a</sup> Tested in two independent screening campaigns using different cell lines/passages.<sup>b</sup> Percent of maximal activation by 5-HT; activation at 10 μM for compounds without EC<sub>50</sub> value.<sup>c</sup> n: Number of concentration curves from ≥2 (typically ≥3) independent experiments.NA: E<sub>max</sub> ≤ 12%.

## **Copy of $^1\text{H}$ , $^{13}\text{C}$ -NMR and HPLC Spectra**

*trans*-[2-(2-Bromophenyl)cyclopropyl]methanamine Hydrochloride (29).

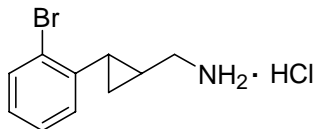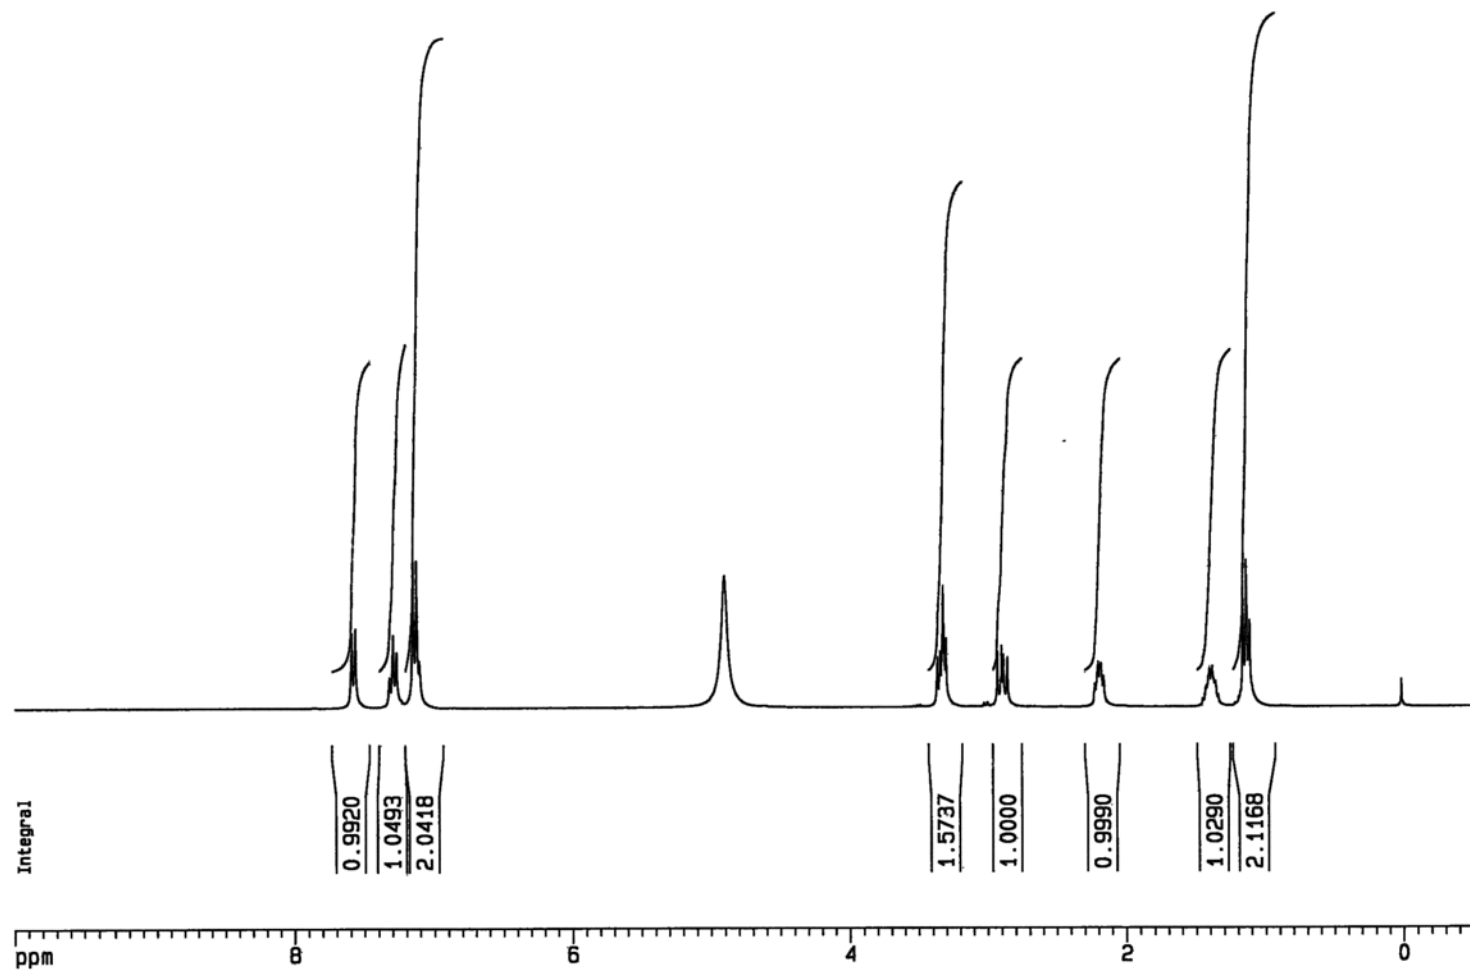

Current Data Parameters  
NAME toru-2-11  
EXPNO 1  
PROCNO 1

F2 - Acquisition Parameters  
Date\_ 20050606  
Time 13.05  
INSTRUM spect  
PROBHD 5 mm GNP 1H  
PULPROG zg30  
TD 65536  
SOLVENT MeOH  
NS 8  
DS 2  
SWH 6172.839 Hz  
FIDRES 0.094190 Hz  
AQ 5.3084660 sec  
RG 228.1  
DW 81.000 usec  
DE 6.00 usec  
TE 300.0 K  
D1 1.0000000 sec

----- CHANNEL f1 -----  
NUC1 1H  
P1 10.20 usec  
PL1 0.00 dB  
SF01 300.1318534 MHz

F2 - Processing parameters  
SI 32768  
SF 300.1300000 MHz  
WDW EM  
SSB 0  
LB 0.30 Hz  
GB 0  
PC 1.00

1D NMR plot parameters  
CX 20.00 cm  
F1P 10.000 ppm  
F1 3001.30 Hz  
F2P -0.500 ppm  
F2 -150.07 Hz  
PPMCM 0.52500 ppm/cm  
HZCM 157.56825 Hz/cm

ppm

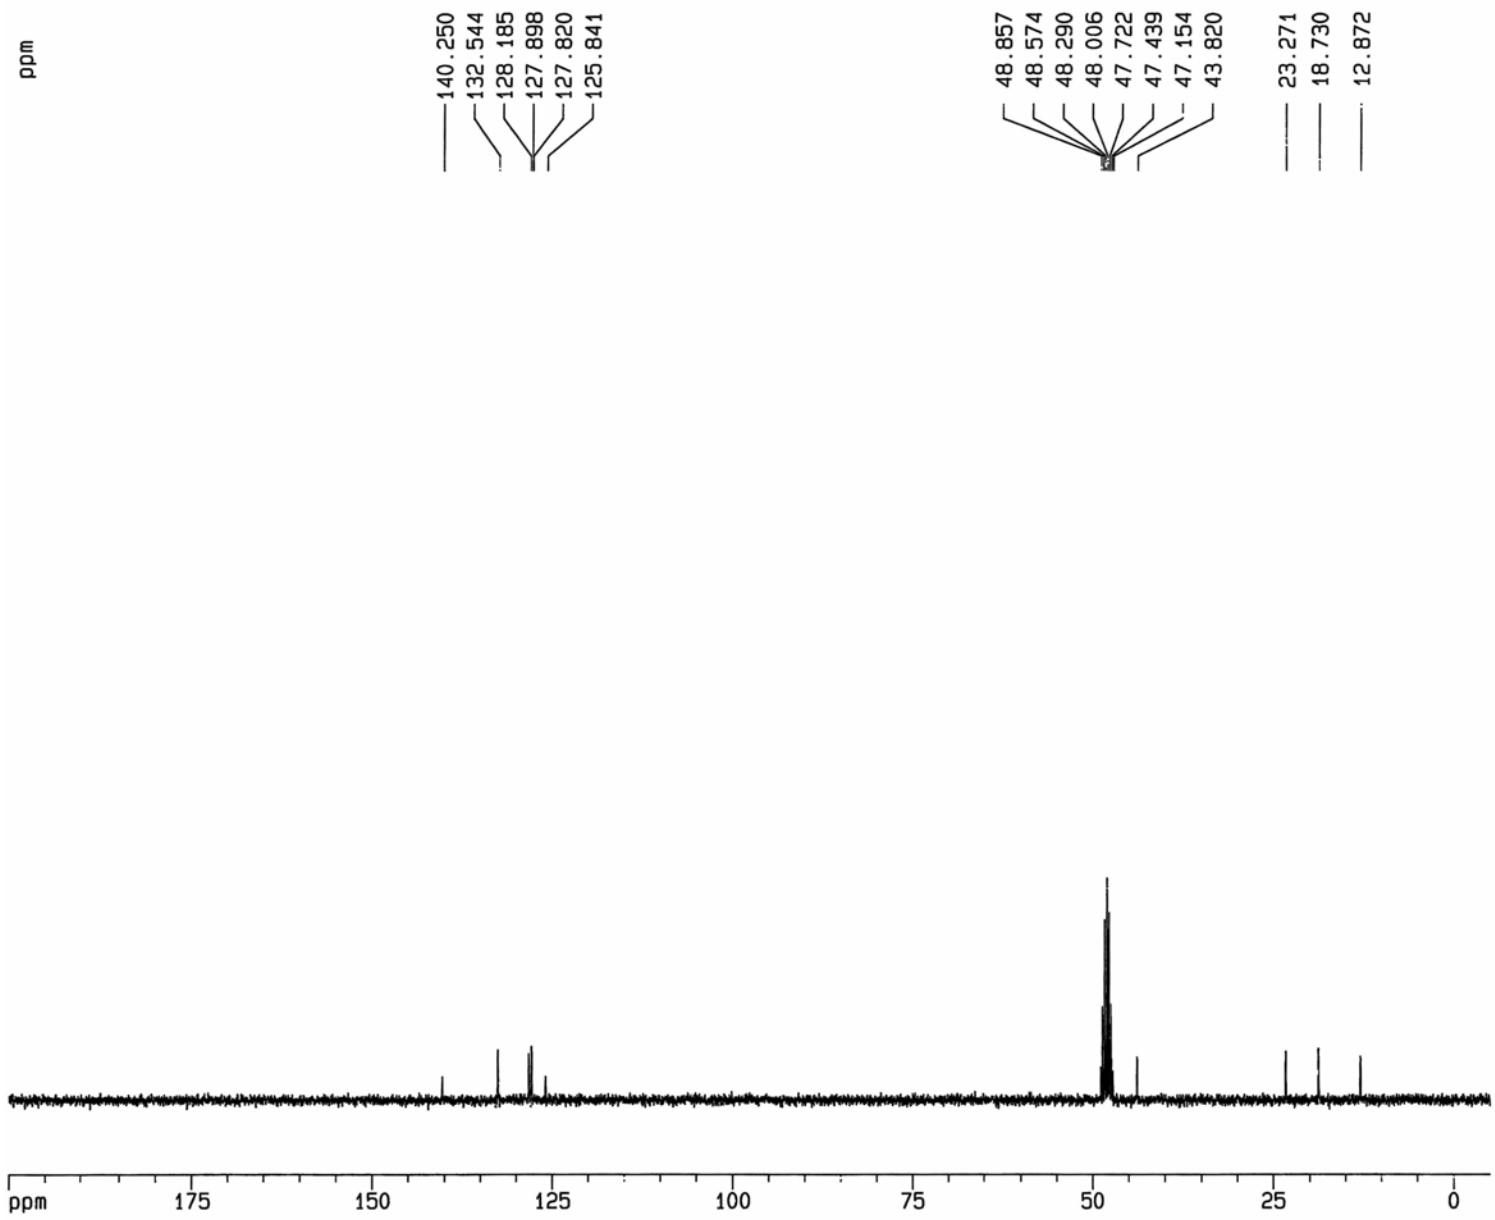

Current Data Parameters  
NAME toru-2-11  
EXPNO 2  
PROCNO 1

F2 - Acquisition Parameters  
Date\_ 20050606  
Time 13.11  
INSTRUM spect  
PROBHD 5 mm QNP 1H  
PULPROG zgpg30  
TD 65536  
SOLVENT MeOH  
NS 186  
DS 4  
SWH 18832.393 Hz  
FIDRES 0.287360 Hz  
AQ 1.7400308 sec  
RG 1024  
DW 26.550 usec  
DE 6.00 usec  
TE 300.0 K  
D1 2.00000000 sec  
D11 0.03000000 sec  
D12 0.00002000 sec

===== CHANNEL f1 =====  
NUC1 13C  
P1 8.00 usec  
PL1 -2.00 dB  
SF01 75.4760200 MHz

===== CHANNEL f2 =====  
CPDPRG2 waltz16  
NUC2 1H  
PCPD2 103.00 usec  
PL2 0.00 dB  
PL12 22.00 dB  
PL13 22.00 dB  
SF02 300.1312005 MHz

F2 - Processing parameters  
SI 32768  
SF 75.4677190 MHz  
WDW EM  
SSB 0  
LB 1.00 Hz  
GB 0  
PC 1.40

1D NMR plot parameters  
CX 20.00 cm  
F1P 200.000 ppm  
F1 15093.54 Hz  
F2P -5.000 ppm  
F2 -377.34 Hz  
PPMCM 10.25000 ppm/cm  
HZCM 773.54419 Hz/cm

# Area % Report

**Method Name:** C:\CLASS-VP\Data\CHO\220 and 280 seq2AQ5-10mm.met  
**Data:** C:\CLASS-VP\Data\CHO\TKU-II-71.001.dat  
**User:** System  
**Acquired:** 9/18/2008 1:33:40 PM  
**Printed:** 09/18/2008 02:47:43 PM

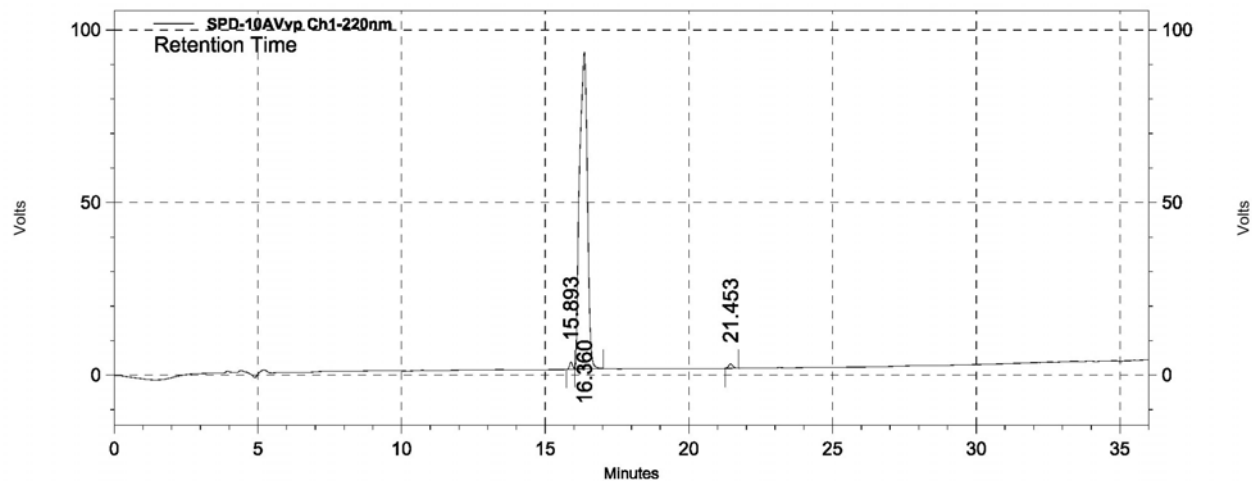

**SPD-10AVvp**  
**Ch1-220nm**  
**Results**

| Retention Time | Area           | Area %        | Height       | Height %      |
|----------------|----------------|---------------|--------------|---------------|
| 15.893         | 14979          | 0.86          | 2111         | 2.22          |
| 16.360         | 1721850        | 98.40         | 91799        | 96.44         |
| 21.453         | 13016          | 0.74          | 1273         | 1.34          |
| <b>Totals</b>  | <b>1749845</b> | <b>100.00</b> | <b>95183</b> | <b>100.00</b> |

*trans*-[2-(3-Methylphenyl)cyclopropyl]methylamine Hydrochloride (37).

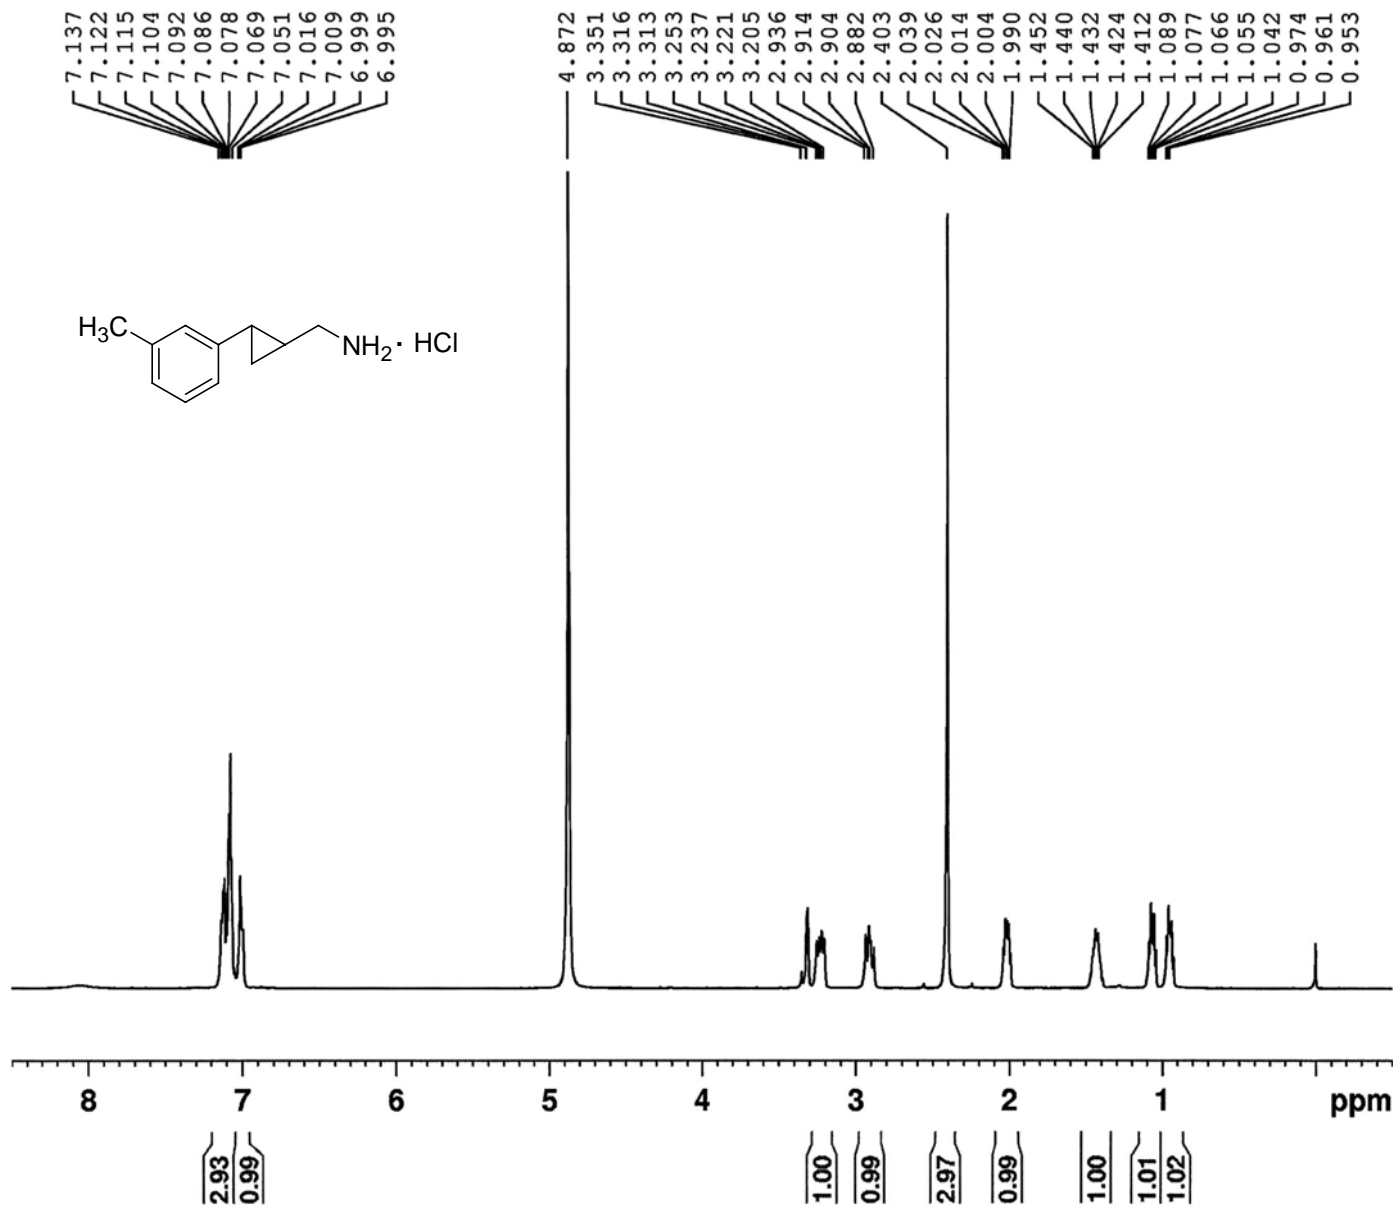

```

Current Data Parameters
NAME          CHO-II-29
EXPNO         .
PROCNO        .

F2 - Acquisition Parameters
Date_         20071218
Time          22.37
INSTRUM       spect
PROBHD        5 mm PABBO BB-
PULPROG       zg30
TD            65536
SOLVENT       MeOD
NS            4
DS            2
SWH           8278.146 Hz
FIDRES        0.126314 Hz
AQ            3.9584243 sec
RG            57
DW            60.400 usec
DE            6.00 usec
TE            297.5 K
D1            1.00000000 sec
MCREST        0.00000000 sec
MCWRK         0.01500000 sec

===== CHANNEL f1 =====
NUC1          1H
P1            13.20 usec
PL1           -2.00 dB
SFO1          400.1724712 MHz

F2 - Processing parameters
SI            32768
SF            400.1700046 MHz
WDW           EM
SSB           0
LB            0.30 Hz
GB            0
PC            1.00

1D NMR plot parameters
CX            30.00 cm
CY            19.00 cm
F1P           8.500 ppm
F1            3401.45 Hz
F2P           -0.500 ppm
F2            -200.08 Hz
PPMCM         0.30000 ppm/c
HZCM          120.05099 Hz/cm
    
```

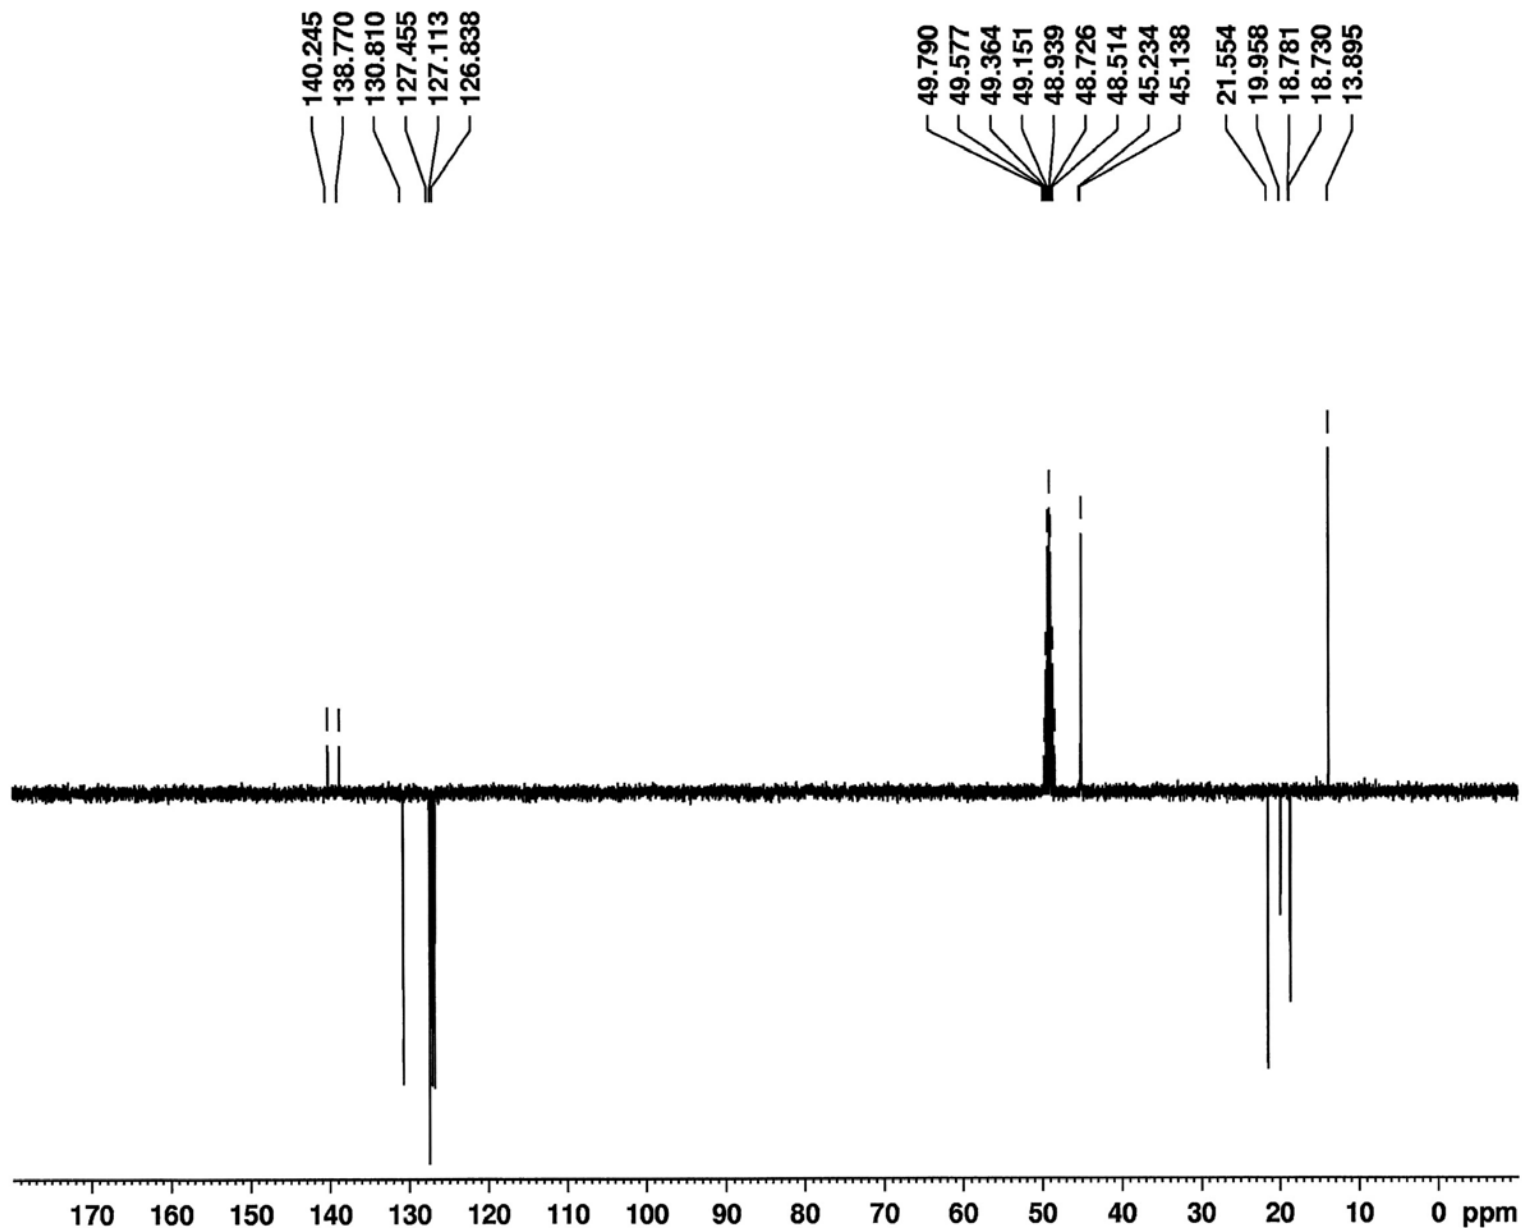

Current Data Parameters

NAME CHO-II-29  
 EXPNO 2  
 PROCNO 1

F2 - Acquisition Parameters

Date\_ 20071218  
 Time 22.38  
 INSTRUM spect  
 PROBHD 5 mm PABBO BB-  
 PULPROG jmod  
 TD 65536  
 SOLVENT MeOD  
 NS 128  
 DS 4  
 SWH 23980.814 Hz  
 FIDRES 0.365918 Hz  
 AQ 1.3664756 sec  
 RG 23170.5  
 DW 20.850 usec  
 DE 6.00 usec  
 TE 297.7 K  
 CNST2 145.0000000  
 CNST11 1.0000000  
 D1 2.0000000 sec  
 d20 0.00689655 sec  
 DELTA 0.00001210 sec  
 MCREST 0.0000000 sec  
 MCWRK 0.01500000 sec

==== CHANNEL f1 =====

NUC1 13C  
 P1 9.50 usec  
 p2 19.00 usec  
 PL1 -2.00 dB  
 SFO1 100.6328888 MHz

==== CHANNEL f2 =====

CPDPRG2 waltz16  
 NUC2 1H  
 PCPD2 80.00 usec  
 PL2 -2.00 dB  
 PL12 13.65 dB  
 SFO2 400.1716007 MHz

F2 - Processing parameters

SI 262144  
 SF 100.6226753 MHz  
 WDW EM  
 SSB 0  
 LB 1.00 Hz  
 GB 0  
 PC 1.40



Method Name: C:\CLASS-VP\Methods\mnl3.met  
 Data Name: C:\CLASS-VP\DATA\Cho\CHO-II-29.004  
 User: System  
 Acquired: 10/9/2007 12:50:22 PM  
 Printed: 10/9/2007 2:44:01 PM

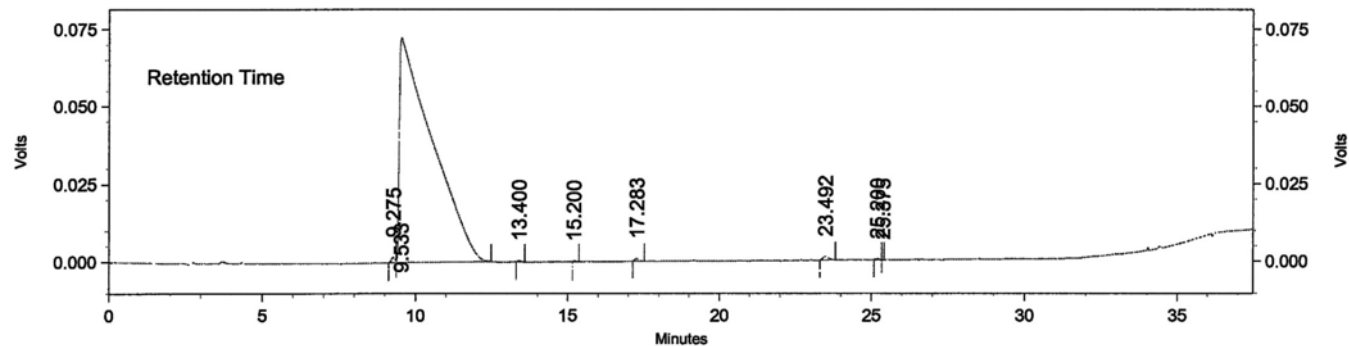

Detector A - 1 (254nm)

| Pk # | Retention Time | Area    | Area % | Height | Height % |
|------|----------------|---------|--------|--------|----------|
| 1    | 9.275          | 13921   | 0.255  | 1742   | 2.252    |
| 2    | 9.533          | 5404481 | 99.170 | 72504  | 93.714   |
| 3    | 13.400         | 2513    | 0.046  | 365    | 0.472    |
| 4    | 15.200         | 1443    | 0.026  | 204    | 0.264    |
| 5    | 17.283         | 8107    | 0.149  | 837    | 1.082    |
| 6    | 23.492         | 15443   | 0.283  | 1200   | 1.551    |
| 7    | 25.200         | 3402    | 0.062  | 364    | 0.470    |
| 8    | 25.375         | 420     | 0.008  | 151    | 0.195    |

|        |  |         |         |       |         |
|--------|--|---------|---------|-------|---------|
| Totals |  | 5449730 | 100.000 | 77367 | 100.000 |
|--------|--|---------|---------|-------|---------|
